# Supplementary material for: Evaluation of microRNA Expression in Patients with Herpes Zoster
Source: PubMed Central journal article supplement (PMC5192387; doi:10.3390/v8120326), 2016-12-02
Supplement: viruses-08-00326-s001.pdf [file viruses-08-00326-s001.pdf]

## Supplementary Materials: Evaluation of microRNA Expression in Patients with Herpes Zoster

Xihan Li, Ying Huang, Yucheng Zhang, Na He

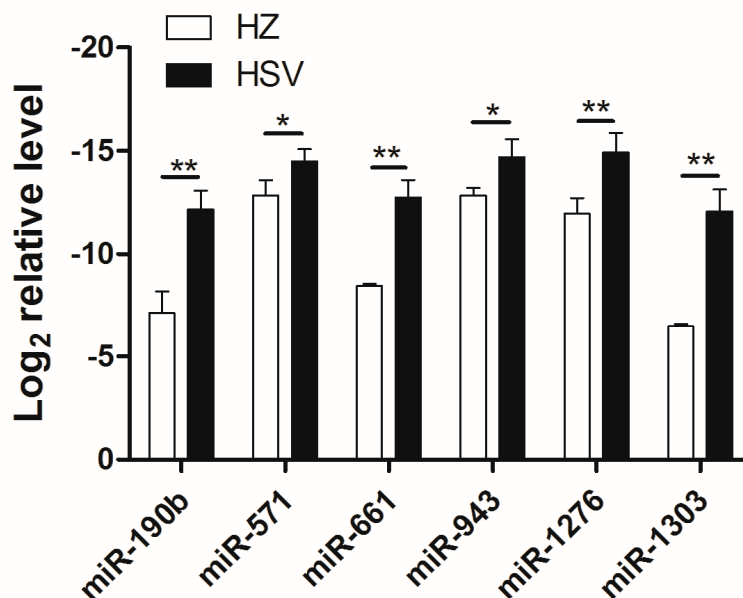

**Figure S1.** Serum miRNA levels in 6 herpes zoster (HZ) patients and herpes simplex virus (HSV) controls were selected for verification using real-time qRT-PCR. Serum levels of miR-190b, miR-571, miR-1276, miR-1303, miR-943 and miR-661 were significantly higher in HZ patients compared with those in the HSV group (\* $p < 0.05$ , \*\* $p < 0.01$ ). Expression levels of the miRNAs are normalized to cel-miR-39 (Log2 relative level).

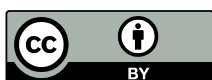

© 2016 by the authors; licensee MDPI, Basel, Switzerland. This article is an open access article distributed under the terms and conditions of the Creative Commons Attribution (CC-BY) license (<http://creativecommons.org/licenses/by/4.0/>).
